# Supplementary material
Source: publisher site journal article supplement (https://www.dovepress.com/article/578038)
Supplement: Supplementary file 1 [file 578038%20Supplementary%20Material.docx]

| Main category Sub-category | Operational definition |  |
| --- | --- | --- |
| Emotional resonance Shock | Denial Immediate disbelief upon diagnosis | Immediate disbelief upon diagnosis |
| Emotional resonance | Shock & denial | Forced re-allocation of family roles |
| Emotional resonance | Role imbalance | Negative affects loop between spouses |
| Dyadic coping | Joint avoidance | Mutual silence on disease-related topics |
| Dyadic coping | Division of labour | Task-splitting to fight illness together |
| Dyadic coping | Embodied support | Physical-verbal synchrony for comfort |
| Dyadic resilience | Meaning reconstruction | Reframing CTDs as “our story” |
| Dyadic resilience | Trust intensification | Daily micro-rituals build safety |
| Dyadic resilience | Future reconstruction | Humour & planning reshape future |

Table S1. Codebook: NVivo node hierarchy (three-level coding frame)

Notes: CTDs, Connective tissue diseases
